# Supplementary material for: Zinc complexes of fluorous alkoxide-imino ligands: Synthesis, structure, and use in ring-opening polymerization of lactide and β-butyrolactone
Source: Royal Society of Chemistry journal article supplement (doi:10.1039/b902087j), 2009-01-01
Supplement: b902087j.pdf [file b902087j.pdf]

Supporting information for

Zinc Complexes of Fluorous Alkoxy-Imino Ligands: Synthesis, Structure, and Use in Ring-Opening Polymerization of Lactide and  $\beta$ -Butyrolactone

*Ekaterina Grunova, Thierry Roisnel, and Jean-François Carpentier*

**Figure S1.**  $^{19}\text{F}\{^1\text{H}\}$  NMR spectrum (188 MHz, benzene- $d_6$ , 298 K) of a 1:1 mixture of  $\text{ZnEt}_2$  and complex **1** (■), showing the formation of complex **4** (●) (reaction time: 30 min)

**Figure S2.**  $^{19}\text{F}\{^1\text{H}\}$  NMR spectrum (188 MHz, benzene- $d_6$ , 298 K) of a 1:1 mixture of  $\text{ZnEt}_2$  and complex **2** (■), showing the formation of complex **5** (●) (reaction time: 30 min)

**Figure S3.**  $^1\text{H}$  NMR spectrum (200 MHz,  $\text{CDCl}_3$ , 298 K) of a PLA ( $M_{n,\text{NMR}} = 14200 \text{ g}\cdot\text{mol}^{-1}$ ,  $M_{n,\text{SEC}} = 10500 \text{ g}\cdot\text{mol}^{-1}$ ,  $M_w/M_n = 1.29$ ) (entry 5, Table 2).

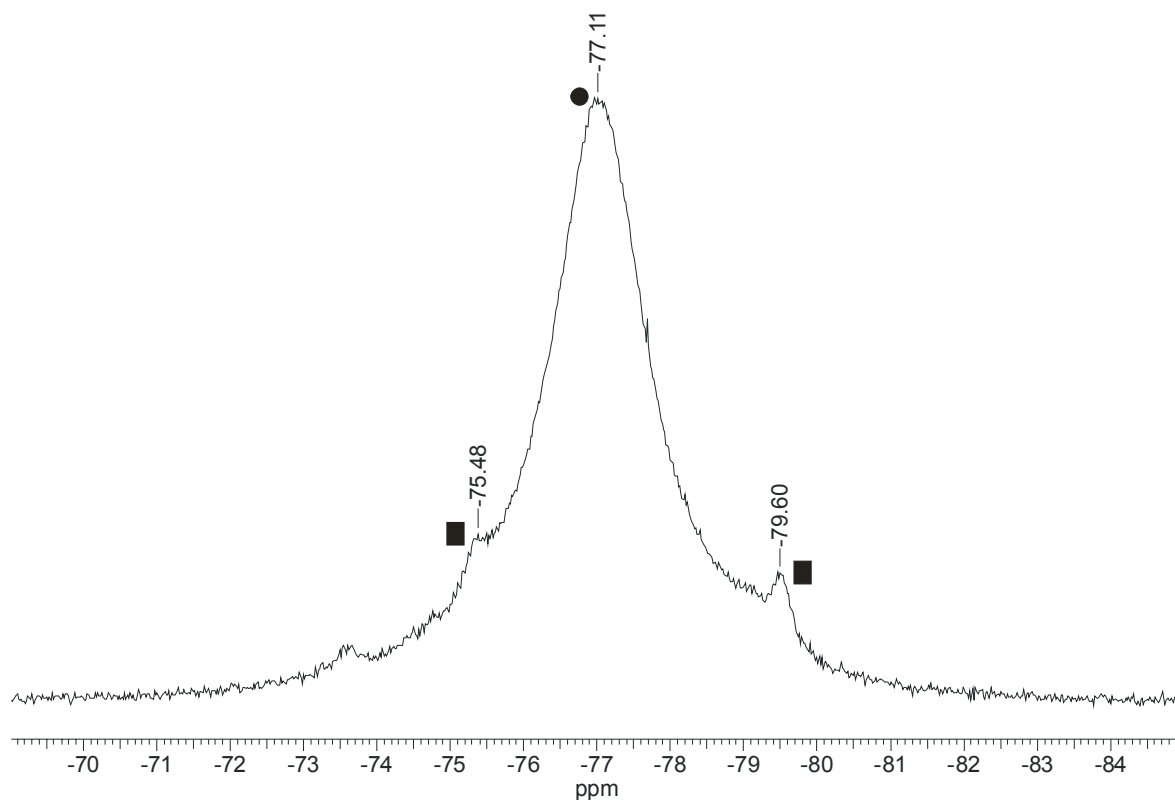

**Figure S1.**  $^{19}\text{F}\{^1\text{H}\}$  NMR spectrum (188 MHz, benzene- $d_6$ , 298 K) of a 1:1 mixture of  $\text{ZnEt}_2$  and complex **1** (■), showing the formation of complex **4** (●) (reaction time: 30 min).

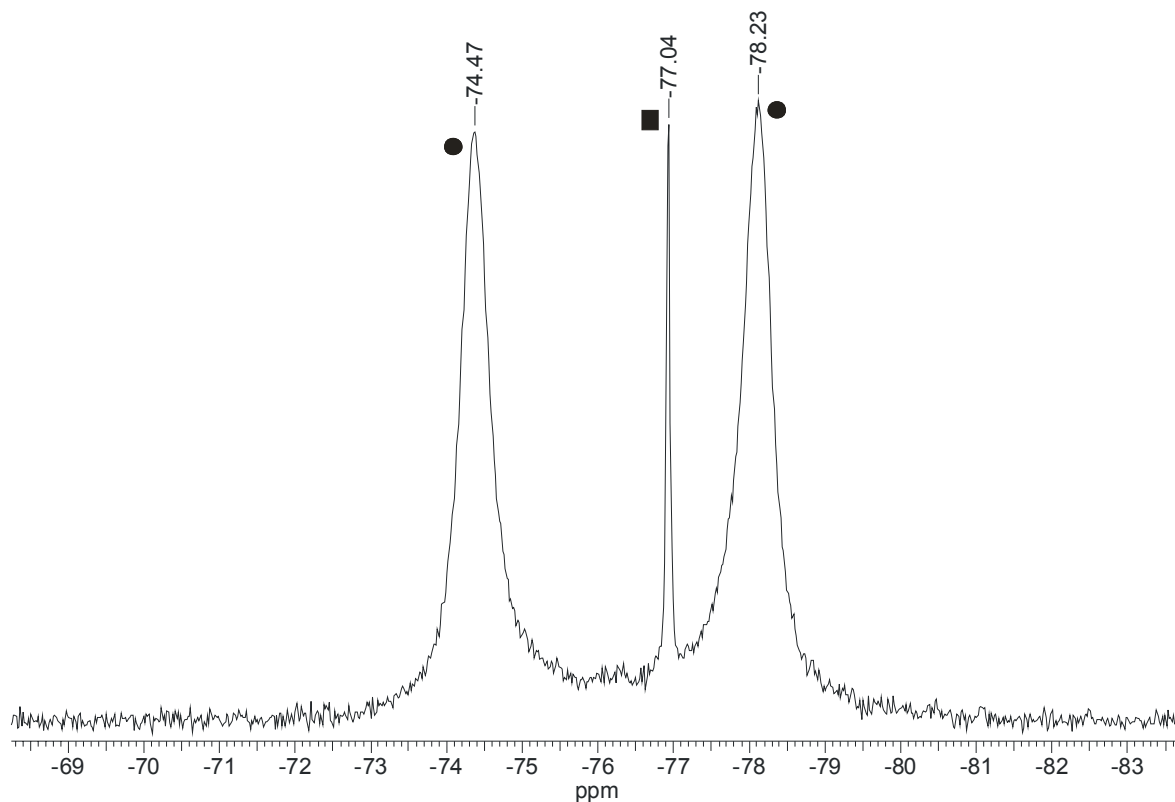

**Figure S2.**  $^{19}\text{F}\{^1\text{H}\}$  NMR spectrum (188 MHz, benzene- $d_6$ , 298 K) of a 1:1 mixture of  $\text{ZnEt}_2$  and complex **2** (■), showing the formation of complex **5** (●) (reaction time: 30 min).

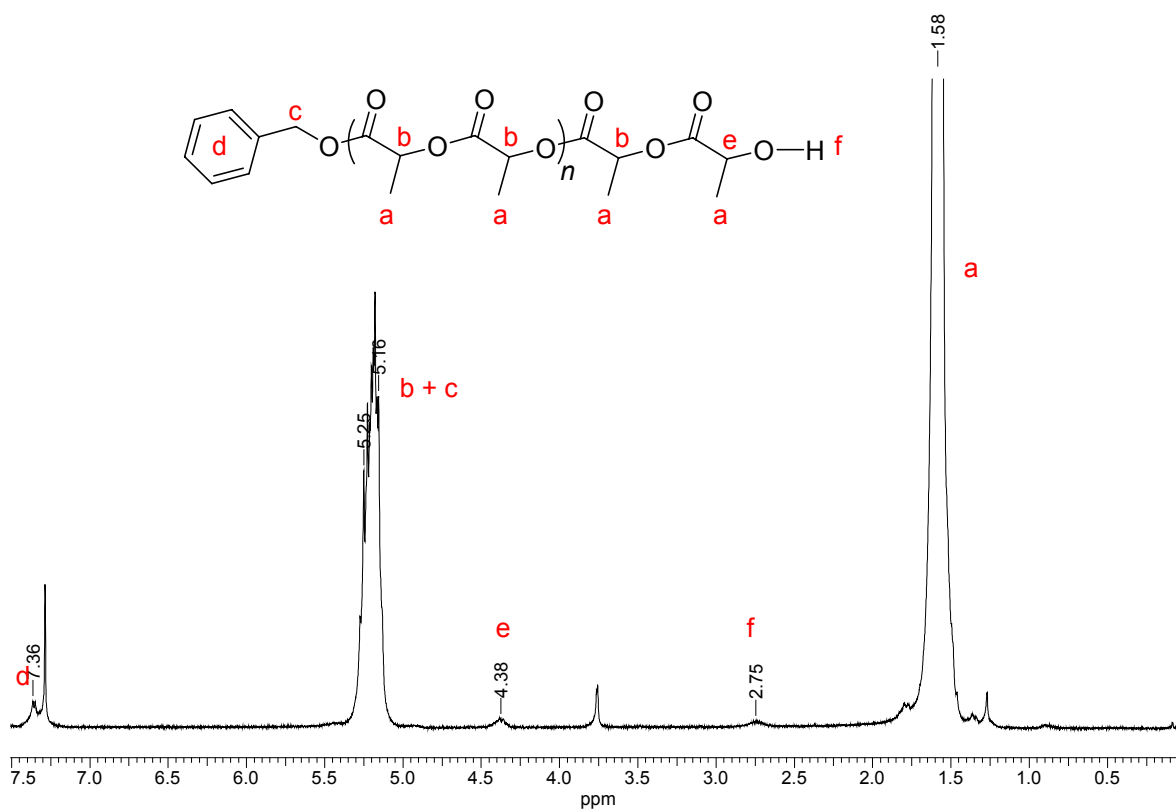

**Figure S3.** <sup>1</sup>H NMR spectrum (200 MHz, CDCl<sub>3</sub>, 298 K) of a PLA ( $M_{n,NMR} = 14200 \text{ g}\cdot\text{mol}^{-1}$ ,  $M_{n,SEC} = 10500 \text{ g}\cdot\text{mol}^{-1}$ ,  $M_w/M_n = 1.29$ ) (entry 5, Table 2).
